# Supplementary material for: Energy Intake, Macronutrient Profile and Food Sources of Spanish Children Aged One to <10 Years—Results from the EsNuPI Study
Source: PubMed Central journal article supplement (PMC7231217; doi:10.3390/nu12040893), 2020-03-25
Supplement: nutrients-12-00893-s001.pdf [file nutrients-12-00893-s001.pdf]

**Supplementary Table 1.** The inadequacy to the European Food Safe Authority and Institute of Medicine recommendations for percentages of samples that do not meet these criteria for fat and carbohydrates by age group and sex in the Spanish Pediatric Population (EsNuPI) study ( $n = 1448$ ).

|                                                              | Reference sample |             |             |            |                          |                          |            |                   |                   |             |                  |                   | Adapted milk consumers |             |             |            |                          |                          |            |                    |                   |             |                   |                   |
|--------------------------------------------------------------|------------------|-------------|-------------|------------|--------------------------|--------------------------|------------|-------------------|-------------------|-------------|------------------|-------------------|------------------------|-------------|-------------|------------|--------------------------|--------------------------|------------|--------------------|-------------------|-------------|-------------------|-------------------|
|                                                              | Total            |             |             | 1-<3 years |                          |                          | 3-<6 years |                   |                   | 6-<10 years |                  |                   | Total                  |             |             | 1-<3 years |                          |                          | 3-<6 years |                    |                   | 6-<10 years |                   |                   |
|                                                              | n                | %           | %           | n          | %                        | %                        | N          | %                 | %                 | n           | %                | %                 | n                      | %           | %           | n          | %                        | %                        | n          | %                  | %                 | n           | %                 | %                 |
| <i>Subjects not meeting the recommendations <sup>1</sup></i> |                  |             |             |            |                          |                          |            |                   |                   |             |                  |                   |                        |             |             |            |                          |                          |            |                    |                   |             |                   |                   |
| <b>(%) Carbohydrates EFSA</b>                                | 707              | 47.8        | 1.1         | 162        | 40.7                     | 1.2                      | 244        | 51.2              | 1.6               | 301         | 48.8             | 0.7               | 741                    | <b>39.3</b> | <b>2.2</b>  | 294        | 31.3 <sup>a</sup>        | 3.7 <sup>a</sup>         | 262        | 42.0 <sup>b</sup>  | 1.5 <sup>a</sup>  | 185         | 48.1 <sup>b</sup> | 0.5 <sup>a</sup>  |
| Boys                                                         | 357              | <b>47.6</b> | <b>0.8</b>  | 84         | 39.3                     | 0.0                      | 122        | 50.8              | 2.5               | 151         | 49.7             | 0.0               | 371                    | <b>39.1</b> | <b>2.4</b>  | 144        | 29.9 <sup>a</sup>        | 4.2 <sup>a</sup>         | 128        | 41.4 <sup>ab</sup> | 1.6 <sup>a</sup>  | 99          | 49.5 <sup>b</sup> | 1.0 <sup>a</sup>  |
| Girls                                                        | 350              | 48.0        | 1.4         | 78         | 42.3                     | 2.6                      | 122        | 51.6              | 0.8               | 150         | 48.0             | 1.3               | 370                    | 39.5        | 1.9         | 150        | 32.7                     | 3.3                      | 134        | 42.5               | 1.5               | 86          | 46.5              | 0.0               |
| <b>(%) Carbohydrates IOM</b>                                 | 707              | 47.8        | 0.3         | 162        | <b>40.7</b>              | <b>0.6</b>               | 244        | 51.2              | 0.4               | 301         | 48.8             | 0.0               | 741                    | <b>39.3</b> | <b>0.1</b>  | 294        | <b>31.3</b> <sup>a</sup> | <b>0.0</b> <sup>a</sup>  | 262        | 42.0 <sup>b</sup>  | 0.4 <sup>a</sup>  | 185         | 48.1 <sup>b</sup> | 0.0 <sup>a</sup>  |
| Boys                                                         | 357              | 47.6        | 0.3         | 84         | 39.3                     | 0.0                      | 122        | 50.8              | 0.8               | 151         | 49.7             | 0.0               | 371                    | 39.1        | 0.3         | 144        | 29.9 <sup>a</sup>        | 0.0 <sup>a</sup>         | 128        | 41.4 <sup>ab</sup> | 0.8 <sup>a</sup>  | 99          | 49.5 <sup>b</sup> | 0.0 <sup>a</sup>  |
| Girls                                                        | 350              | <b>48.0</b> | <b>0.3</b>  | 78         | 42.3                     | 1.3                      | 122        | 51.6              | 0.0               | 150         | 48.0             | 0.0               | 370                    | <b>39.5</b> | <b>0.0</b>  | 150        | 32.7                     | 0.0                      | 134        | 42.5               | 0.0               | 86          | 46.5              | 0.0               |
| <b>(%) Fat EFSA</b>                                          | 707              | <b>15.7</b> | <b>47.2</b> | 162        | <b>43.8</b> <sup>a</sup> | <b>29.0</b> <sup>a</sup> | 244        | 16.0 <sup>b</sup> | 44.7 <sup>b</sup> | 301         | 0.3 <sup>c</sup> | 59.1 <sup>c</sup> | 741                    | <b>27.5</b> | <b>38.5</b> | 294        | <b>52.0</b> <sup>a</sup> | <b>18.0</b> <sup>a</sup> | 262        | 19.5 <sup>b</sup>  | 43.9 <sup>b</sup> | 185         | 0.0 <sup>c</sup>  | 63.2 <sup>c</sup> |
| Boys                                                         | 357              | <b>16.8</b> | <b>45.9</b> | 84         | 45.2 <sup>a</sup>        | 27.4 <sup>a</sup>        | 122        | 18.0 <sup>b</sup> | 41.0 <sup>a</sup> | 151         | 0.0 <sup>c</sup> | 60.3 <sup>b</sup> | 371                    | <b>24.3</b> | <b>37.7</b> | 144        | 46.5 <sup>a</sup>        | 19.4 <sup>a</sup>        | 128        | 18.0 <sup>b</sup>  | 43.0 <sup>b</sup> | 99          | 0.0 <sup>c</sup>  | 57.6 <sup>b</sup> |
| Girls                                                        | 350              | <b>14.6</b> | <b>48.6</b> | 78         | 42.3 <sup>a</sup>        | 30.8 <sup>a</sup>        | 122        | 13.9 <sup>b</sup> | 48.4 <sup>b</sup> | 150         | 0.7 <sup>c</sup> | 58.0 <sup>b</sup> | 370                    | <b>30.8</b> | <b>39.2</b> | 150        | 57.3 <sup>a</sup>        | 16.7 <sup>a</sup>        | 134        | 20.9 <sup>b</sup>  | 44.8 <sup>b</sup> | 86          | 1.2 <sup>c</sup>  | 69.8 <sup>c</sup> |
| <b>(%) Fat IOM <sup>2</sup></b>                              | 707              | <b>7.4</b>  | <b>47.2</b> | 162        | <b>17.9</b> <sup>a</sup> | <b>29.0</b> <sup>a</sup> | 244        | 7.4 <sup>b</sup>  | 44.7 <sup>b</sup> | 301         | 1.7 <sup>c</sup> | 59.1 <sup>c</sup> | 741                    | <b>12.4</b> | <b>38.5</b> | 294        | <b>23.1</b> <sup>a</sup> | <b>18.0</b> <sup>a</sup> | 262        | 8.4 <sup>b</sup>   | 43.9 <sup>b</sup> | 185         | 1.1 <sup>c</sup>  | 63.2 <sup>c</sup> |
| Boys                                                         | 357              | <b>7.8</b>  | <b>45.9</b> | 84         | 20.2 <sup>a</sup>        | 27.4 <sup>a</sup>        | 122        | 8.2 <sup>b</sup>  | 41.0 <sup>a</sup> | 151         | 0.7 <sup>c</sup> | 60.3 <sup>b</sup> | 371                    | <b>11.3</b> | <b>37.7</b> | 144        | 22.2 <sup>a</sup>        | 19.4 <sup>a</sup>        | 128        | 7.0 <sup>b</sup>   | 43.0 <sup>b</sup> | 99          | 1.0 <sup>b</sup>  | 57.6 <sup>b</sup> |
| Girls                                                        | 350              | <b>6.9</b>  | <b>48.6</b> | 78         | 15.4 <sup>a</sup>        | 30.8 <sup>a</sup>        | 122        | 6.6 <sup>ab</sup> | 48.4 <sup>b</sup> | 150         | 2.7 <sup>b</sup> | 58.0 <sup>b</sup> | 370                    | <b>13.5</b> | <b>39.2</b> | 150        | 24.0 <sup>a</sup>        | 16.7 <sup>a</sup>        | 134        | 9.7 <sup>b</sup>   | 44.8 <sup>b</sup> | 86          | 1.2 <sup>c</sup>  | 69.8 <sup>c</sup> |

BR: below the recommendations; AR: above recommendations. Results are expressed in percentage. Recommended daily intakes according to Europe Food Safety Authority (EFSA) and for Americans, Institute of Medicine (IOM) [31,32]. Percentage for inadequacy was calculated comparing with of the EFSA and IOM recommendations. In the first column percentage below the recommendations and in the second percentage above the recommendations. <sup>1</sup>Chi squared test were used to evaluate differences within the percentage of samples that do not meet these criteria for fat and carbohydrates recommendations by sex and age groups between the reference and adapted milk consumers sample (mean values, are shown in bold type). Z-test was used to calculate differences within the percentage of samples that do not meet these criteria for fat and carbohydrates recommendations among age groups (mean values; values with different superscript letters were significantly different).

**Supplementary Table 2.** Reported energy intake for the total and for the plausible reporters of the Nutritional Study in Spanish Pediatric Population (EsNuPI) according to age group and sex ( $n = 1446$ )\*.

| Energy (Kcal/day)                | Total and plausible reporters |      |     |        |     |            |      |     |                   |     |            |      |     |                   |     |             |      |     |                   |     | P |
|----------------------------------|-------------------------------|------|-----|--------|-----|------------|------|-----|-------------------|-----|------------|------|-----|-------------------|-----|-------------|------|-----|-------------------|-----|---|
|                                  | Total                         |      |     |        |     | 1-<3 years |      |     |                   |     | 3-<6 years |      |     |                   |     | 6-<10 years |      |     |                   |     |   |
|                                  | n                             | Mean | SD  | Median | IQR | n          | Mean | SD  | Median            | IQR | n          | Mean | SD  | Median            | IQR | n           | Mean | SD  | Median            | IQR |   |
| Reference                        | 707                           | 1503 | 417 | 1484   | 526 | 162        | 1229 | 347 | 1215 <sup>a</sup> | 485 | 244        | 1492 | 347 | 1497 <sup>b</sup> | 431 | 30          | 1660 | 427 | 1600 <sup>c</sup> | 533 |   |
| Reference plausible              | 598                           | 1507 | 386 | 1491   | 488 | 120        | 1169 | 292 | 1162 <sup>a</sup> | 389 | 211        | 1491 | 300 | 1480 <sup>b</sup> | 369 | 267         | 1672 | 382 | 1624 <sup>c</sup> | 479 |   |
| Adapted milk consumers           | 741                           | 1404 | 394 | 1375   | 491 | 294        | 1181 | 306 | 1163 <sup>a</sup> | 375 | 262        | 1497 | 371 | 1475 <sup>b</sup> | 456 | 185         | 1626 | 375 | 1577 <sup>c</sup> | 464 |   |
| Adapted milk consumers plausible | 618                           | 1391 | 354 | 1365   | 460 | 236        | 1148 | 234 | 1149 <sup>a</sup> | 326 | 224        | 1456 | 295 | 1471 <sup>b</sup> | 405 | 158         | 1662 | 341 | 1602 <sup>c</sup> | 408 |   |

Average energy intake values for two 24-h dietary recalls were used. Results are expressed as the mean, standard deviation, median and interquartile range (IQR). Kruskal-Wallis analysis was used to calculate differences among age groups (median values, values with different superscript letters were significantly different). P-value <0.05 was considered statistically significant. \* Data from a total sample of 1446 participants of the EsNuPI study have been used for the evaluation of misreporting, due to the lack of information on physical activity data of two study participants ( $n = 1$  SRS;  $n = 1$  AMS).

**Supplementary Table 3.** Distribution of reported intakes of macronutrients as percentage of the total energy intake (%EI) from two 24-h dietary recalls for the total sample and for the plausible reporters of the Nutritional Study in Spanish Pediatric Population (EsNuPI) according to sex and age group ( $n = 1446$ ) \*.

|                                  | Total |             | 1-<3 years |                         | 3-<6 years |                         | 6-<10 years |                   | P      |
|----------------------------------|-------|-------------|------------|-------------------------|------------|-------------------------|-------------|-------------------|--------|
|                                  | n     | %           | n          | %                       | n          | %                       | n           | %                 |        |
| <b>(%) Proteins</b>              |       |             |            |                         |            |                         |             |                   |        |
| Reference                        | 707   | <b>16.5</b> | 162        | 15.9 <sup>a</sup>       | 244        | <b>16.8<sup>b</sup></b> | 301         | 16.6 <sup>b</sup> | 0.009  |
| Reference plausible              | 598   | <b>16.6</b> | 120        | <b>15.9<sup>a</sup></b> | 211        | <b>16.8<sup>b</sup></b> | 267         | 16.6 <sup>b</sup> | 0.016  |
| Adapted milk consumers           | 741   | <b>15.6</b> | 294        | <b>15.0<sup>a</sup></b> | 262        | <b>15.9<sup>b</sup></b> | 185         | 16.2 <sup>b</sup> | <0.001 |
| Adapted milk consumers plausible | 618   | <b>15.6</b> | 236        | <b>14.9<sup>a</sup></b> | 224        | <b>16.0<sup>b</sup></b> | 158         | 16.2 <sup>b</sup> | <0.001 |
| <b>(%) Carbohydrates</b>         |       |             |            |                         |            |                         |             |                   |        |
| Reference                        | 707   | <b>45.4</b> | 162        | <b>46.2</b>             | 244        | 45.2                    | 301         | 45.1              | 0.176  |
| Reference plausible              | 598   | <b>45.3</b> | 120        | <b>46.1</b>             | 211        | 44.9                    | 267         | 45.3              | 0.25   |
| Adapted milk consumers           | 741   | <b>46.7</b> | 294        | 48.3 <sup>a</sup>       | 262        | 45.9 <sup>b</sup>       | 185         | 45.3 <sup>b</sup> | <0.001 |
| Adapted milk consumers plausible | 618   | <b>46.7</b> | 236        | <b>48.6<sup>a</sup></b> | 224        | 45.6 <sup>b</sup>       | 158         | 45.3 <sup>b</sup> | <0.001 |
| <b>(%) Fat</b>                   |       |             |            |                         |            |                         |             |                   |        |
| Reference                        | 707   | 36.5        | 162        | <b>36.2</b>             | 244        | 36.4                    | 301         | 36.7              | 0.63   |
| Reference plausible              | 598   | 36.5        | 120        | <b>36.2</b>             | 211        | 36.6                    | 267         | 36.5              | 0.84   |
| Adapted milk consumers           | 741   | 35.9        | 294        | <b>34.6<sup>a</sup></b> | 262        | 36.6 <sup>b</sup>       | 185         | 37.0 <sup>b</sup> | <0.001 |
| Adapted milk consumers plausible | 618   | 36.0        | 236        | <b>34.5<sup>a</sup></b> | 224        | 36.8 <sup>b</sup>       | 158         | 37.1 <sup>b</sup> | <0.001 |

EI: Energy intake. Results are expressed in percentage of contribution to the total energy intake. T-test was used to evaluate differences by sex and age groups between the reference and adapted milk consumers and between plausible reporters, reference plausible and adapted milk consumers plausible (mean values, are shown in boldface type). ANOVA analysis was used to calculate differences among age groups (mean values; values with different superscript letters were significantly different). p-value <0.05 was considered statistically significant. \*Data from a total sample of 1446 participants of the EsNuPI study have been used for the evaluation of misreporting, due to the lack of information on physical activity data of two study participants ( $n = 1$  SRS;  $n = 1$  AMS).

**Supplementary Table 4.** The adequacy to the European Food Safe Authority and Institute of Medicine recommendations for energy and protein intakes and percentages of samples that meet these criteria for fat and carbohydrates for the plausible sample by age group and sex for the Nutritional Study in Spanish Pediatric Population (EsNuPI) ( $n = 1448$ ).

|                                                         | Reference plausible sample |             |            |                        |            |                    |             |                   |          | Adapted milk consumers plausible sample |             |            |                        |            |                    |             |                   |          |
|---------------------------------------------------------|----------------------------|-------------|------------|------------------------|------------|--------------------|-------------|-------------------|----------|-----------------------------------------|-------------|------------|------------------------|------------|--------------------|-------------|-------------------|----------|
|                                                         | Total                      |             | 1-<3 years |                        | 3-<6 years |                    | 6-<10 years |                   | <i>p</i> | Total                                   |             | 1-<3 years |                        | 3-<6 years |                    | 6-<10 years |                   | <i>p</i> |
|                                                         | <i>n</i>                   | %           | <i>n</i>   | %                      | <i>n</i>   | %                  | <i>n</i>    | %                 |          | <i>n</i>                                | %           | <i>n</i>   | %                      | <i>n</i>   | %                  | <i>n</i>    | %                 |          |
| <b>Adequacy to recommendations<sup>1</sup></b>          |                            |             |            |                        |            |                    |             |                   |          |                                         |             |            |                        |            |                    |             |                   |          |
| (%) Energy intake EFSA                                  | 598                        | <b>111</b>  | 120        | 133 <sup>a</sup>       | 211        | 115 <sup>b</sup>   | 267         | 97.7 <sup>c</sup> | <0.001   | 618                                     | <b>117</b>  | 236        | 134 <sup>a</sup>       | 224        | 114 <sup>b</sup>   | 158         | 97.0 <sup>c</sup> | <0.001   |
| Boys                                                    | 307                        | 112         | 69         | 130 <sup>a</sup>       | 109        | 115 <sup>b</sup>   | 129         | 99.6 <sup>c</sup> | <0.001   | 314                                     | 113         | 119        | 128 <sup>a</sup>       | 111        | 110 <sup>b</sup>   | 84          | 95.5 <sup>c</sup> | <0.001   |
| Girls                                                   | 291                        | <b>110</b>  | 51         | 137 <sup>a</sup>       | 102        | 115 <sup>b</sup>   | 138         | 95.9 <sup>c</sup> | <0.001   | 304                                     | <b>122</b>  | 117        | 140 <sup>a</sup>       | 113        | 118 <sup>b</sup>   | 74          | 98.8 <sup>c</sup> | <0.001   |
| (%) Energy intake IOM                                   | 598                        | <b>80.6</b> | 120        | 120 <sup>a</sup>       | 211        | 74.6 <sup>b</sup>  | 267         | 68.0 <sup>c</sup> | <0.001   | 618                                     | <b>90.3</b> | 236        | 118 <sup>a</sup>       | 224        | 75.2 <sup>b</sup>  | 158         | 69.1 <sup>c</sup> | <0.001   |
| Boys                                                    | 307                        | <b>79.6</b> | 69         | 119 <sup>a</sup>       | 109        | 71.8 <sup>b</sup>  | 129         | 65.1 <sup>c</sup> | <0.001   | 314                                     | <b>87.0</b> | 119        | 118 <sup>a</sup>       | 111        | 70.8 <sup>b</sup>  | 84          | 64.4 <sup>b</sup> | <0.001   |
| Girls                                                   | 291                        | <b>81.8</b> | 51         | 120 <sup>a</sup>       | 102        | 77.5 <sup>b</sup>  | 138         | 70.7 <sup>c</sup> | <0.001   | 304                                     | <b>93.6</b> | 117        | 120 <sup>a</sup>       | 113        | 79.4 <sup>b</sup>  | 74          | 74.3 <sup>b</sup> | <0.001   |
| (%) Proteins EFSA                                       | 598                        | 344         | 120        | <b>376<sup>a</sup></b> | 211        | 409 <sup>b</sup>   | 267         | 279 <sup>c</sup>  | <0.001   | 618                                     | 350         | 236        | <b>351<sup>a</sup></b> | 224        | 397 <sup>b</sup>   | 158         | 283 <sup>c</sup>  | <0.001   |
| Boys                                                    | 307                        | 353         | 69         | 376 <sup>a</sup>       | 109        | 415 <sup>b</sup>   | 129         | 287 <sup>c</sup>  | <0.001   | 314                                     | 342         | 119        | 336 <sup>a</sup>       | 111        | 394 <sup>b</sup>   | 84          | 283 <sup>c</sup>  | <0.001   |
| Girls                                                   | 291                        | <b>335</b>  | 51         | 376 <sup>a</sup>       | 102        | 403 <sup>a</sup>   | 138         | 270 <sup>b</sup>  | <0.001   | 304                                     | <b>359</b>  | 117        | 365 <sup>a</sup>       | 113        | 400 <sup>b</sup>   | 74          | 284 <sup>ca</sup> | <0.001   |
| (%) Proteins IOM                                        | 598                        | 348         | 120        | <b>355<sup>a</sup></b> | 211        | 384 <sup>b</sup>   | 267         | 316 <sup>c</sup>  | <0.001   | 618                                     | 337         | 236        | <b>329<sup>a</sup></b> | 224        | 364 <sup>b</sup>   | 158         | 312 <sup>a</sup>  | <0.001   |
| Boys                                                    | 307                        | <b>362</b>  | 69         | 365 <sup>a</sup>       | 109        | 394 <sup>a</sup>   | 129         | 334 <sup>ab</sup> | <0.001   | 314                                     | 332         | 119        | 320 <sup>a</sup>       | 111        | 358 <sup>b</sup>   | 84          | 317 <sup>a</sup>  | 0.001    |
| Girls                                                   | 291                        | 333         | 51         | 342 <sup>a</sup>       | 102        | 373 <sup>a</sup>   | 138         | 299 <sup>b</sup>  | <0.001   | 304                                     | 343         | 117        | 339 <sup>a</sup>       | 113        | 370 <sup>ab</sup>  | 74          | 306 <sup>b</sup>  | <0.001   |
| <b>Subjects meeting the recommendations<sup>2</sup></b> |                            |             |            |                        |            |                    |             |                   |          |                                         |             |            |                        |            |                    |             |                   |          |
| (%) Carbohydrates EFSA <sup>2</sup>                     | 598                        | <b>50.7</b> | 120        | 59.2                   | 211        | 45.5               | 267         | 50.9              | 0.145    | 618                                     | <b>57.6</b> | 236        | 65.3 <sup>a</sup>      | 224        | 53.1 <sup>b</sup>  | 158         | 52.5 <sup>b</sup> | <0.001   |
| Boys                                                    | 307                        | <b>51.8</b> | 69         | 60.9                   | 109        | 45.9               | 129         | 51.9              | 0.070    | 314                                     | <b>58.9</b> | 119        | 68.1 <sup>a</sup>      | 111        | 55.9 <sup>ab</sup> | 84          | 50.0 <sup>b</sup> | 0.003    |
| Girls                                                   | 291                        | 49.5        | 51         | 56.9                   | 102        | 45.1               | 138         | 50.0              | 0.671    | 304                                     | 56.3        | 117        | 62.4                   | 113        | 50.4               | 74          | 55.4              | 0.140    |
| (%) Carbohydrates IOM <sup>2</sup>                      | 598                        | <b>51.7</b> | 120        | 60.0                   | 211        | 46.9               | 267         | 51.7              | 0.142    | 618                                     | <b>59.7</b> | 236        | 69.5 <sup>a</sup>      | 224        | 54.5 <sup>b</sup>  | 158         | 52.5 <sup>b</sup> | 0.002    |
| Boys                                                    | 307                        | 52.4        | 69         | 60.9                   | 109        | 47.7               | 129         | 51.9              | 0.331    | 314                                     | 61.1        | 119        | 73.1 <sup>a</sup>      | 111        | 56.8 <sup>b</sup>  | 84          | 50.0 <sup>b</sup> | 0.007    |
| Girls                                                   | 291                        | 50.9        | 51         | 58.8                   | 102        | 46.1               | 138         | 51.4              | 0.325    | 304                                     | 58.2        | 117        | 65.8                   | 113        | 52.2               | 74          | 55.4              | 0.096    |
| (%) Fat EFSA <sup>2</sup>                               | 598                        | <b>37.5</b> | 120        | 27.5 <sup>a</sup>      | 211        | 36.5 <sup>ab</sup> | 267         | 42.7 <sup>b</sup> | <0.001   | 618                                     | <b>33.0</b> | 236        | 28.0                   | 224        | 36.2               | 158         | 36.1              | <0.001   |
| Boys                                                    | 307                        | <b>38.1</b> | 69         | 27.5                   | 109        | 39.4               | 129         | 57.4              | <0.001   | 314                                     | <b>38.2</b> | 119        | 32.8                   | 111        | 41.4               | 84          | 58.3              | <0.001   |
| Girls                                                   | 291                        | <b>36.8</b> | 51         | 27.5                   | 102        | 33.3               | 138         | 42.8              | <0.001   | 304                                     | <b>27.6</b> | 117        | 32.1                   | 113        | 31.0               | 74          | 29.7              | <0.001   |
| (%) Fat IOM <sup>2</sup>                                | 598                        | <b>45.0</b> | 120        | 50.0                   | 211        | 46.4               | 267         | 41.6              | <0.001   | 618                                     | <b>47.4</b> | 236        | 56.4 <sup>a</sup>      | 224        | 46.4 <sup>ab</sup> | 158         | 35.4 <sup>b</sup> | <0.001   |
| Boys                                                    | 307                        | <b>47.6</b> | 69         | 50.7                   | 109        | 51.4               | 129         | 42.6              | <0.001   | 314                                     | <b>50.6</b> | 119        | 56.3                   | 111        | 51.4               | 84          | 58.3              | <0.001   |
| Girls                                                   | 291                        | <b>42.3</b> | 51         | 49.0                   | 102        | 41.2               | 138         | 40.6              | 0.001    | 304                                     | <b>44.1</b> | 117        | 56.4 <sup>a</sup>      | 113        | 41.6 <sup>ab</sup> | 74          | 28.4 <sup>b</sup> | <0.001   |

Results are expressed in percentage (%). Recommended daily intakes according to Europe Food Safety Authority (EFSA) and Institute of Medicine (IOM) [31,32].<sup>1</sup> *t*-test was used to evaluate differences for the adequacy to the EFSA and IOM recommendations for energy and protein intakes by sex and age groups between the reference plausible and adapted milk consumers plausible sample (mean values, are shown in boldface type). ANOVA analysis was used to calculate differences for the adequacy to the EFSA and IOM recommendations for energy and protein intakes among age groups (mean values; values with different superscript letters were significantly different).<sup>2</sup> *Chi*-squared test was used to evaluate differences within the percentage of samples that meet these criteria for fat and carbohydrates recommendations by sex and age groups between the reference plausible and adapted milk consumers plausible sample (mean values, are shown in bold type). *Z*-test was used to calculate differences within the percentage of samples that meet these criteria for fat and carbohydrates recommendations among age groups (mean values; values with different superscript letters were significantly different).
